# Supplementary material for: Characteristics of SOX9-positive progenitor-like cells during cholestatic liver regeneration in biliary atresia
Source: PubMed Central journal article supplement (PMC8935712; doi:10.1186/s13287-022-02795-2), 2022-03-21

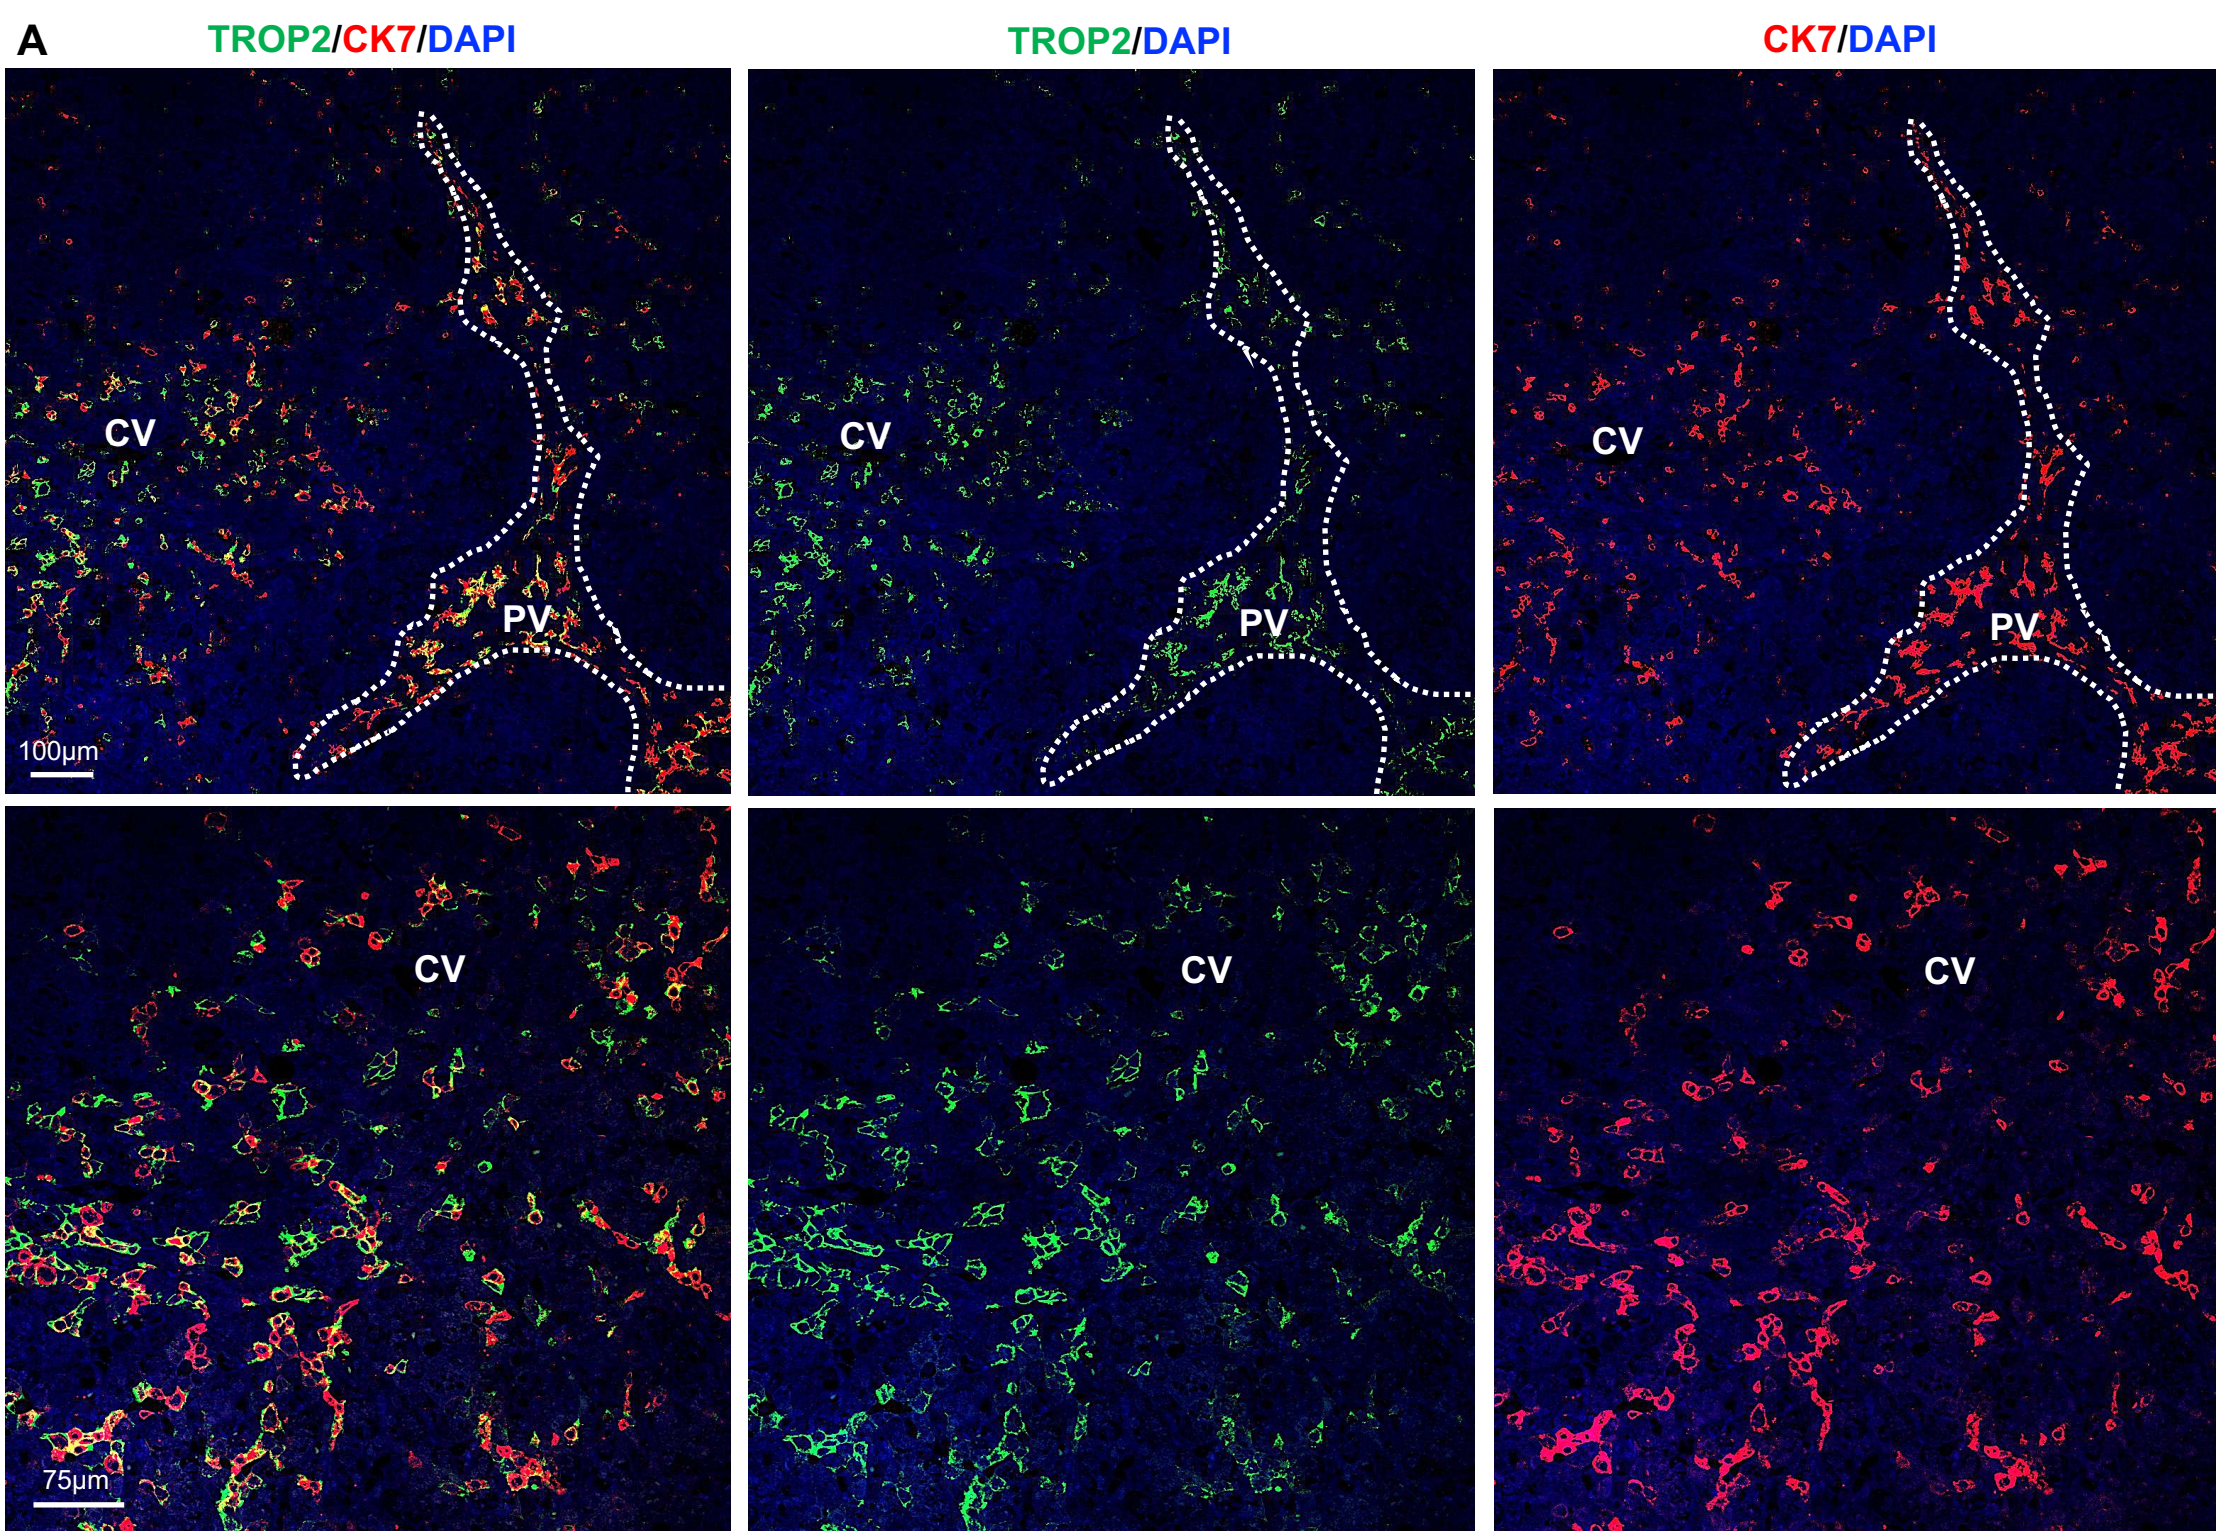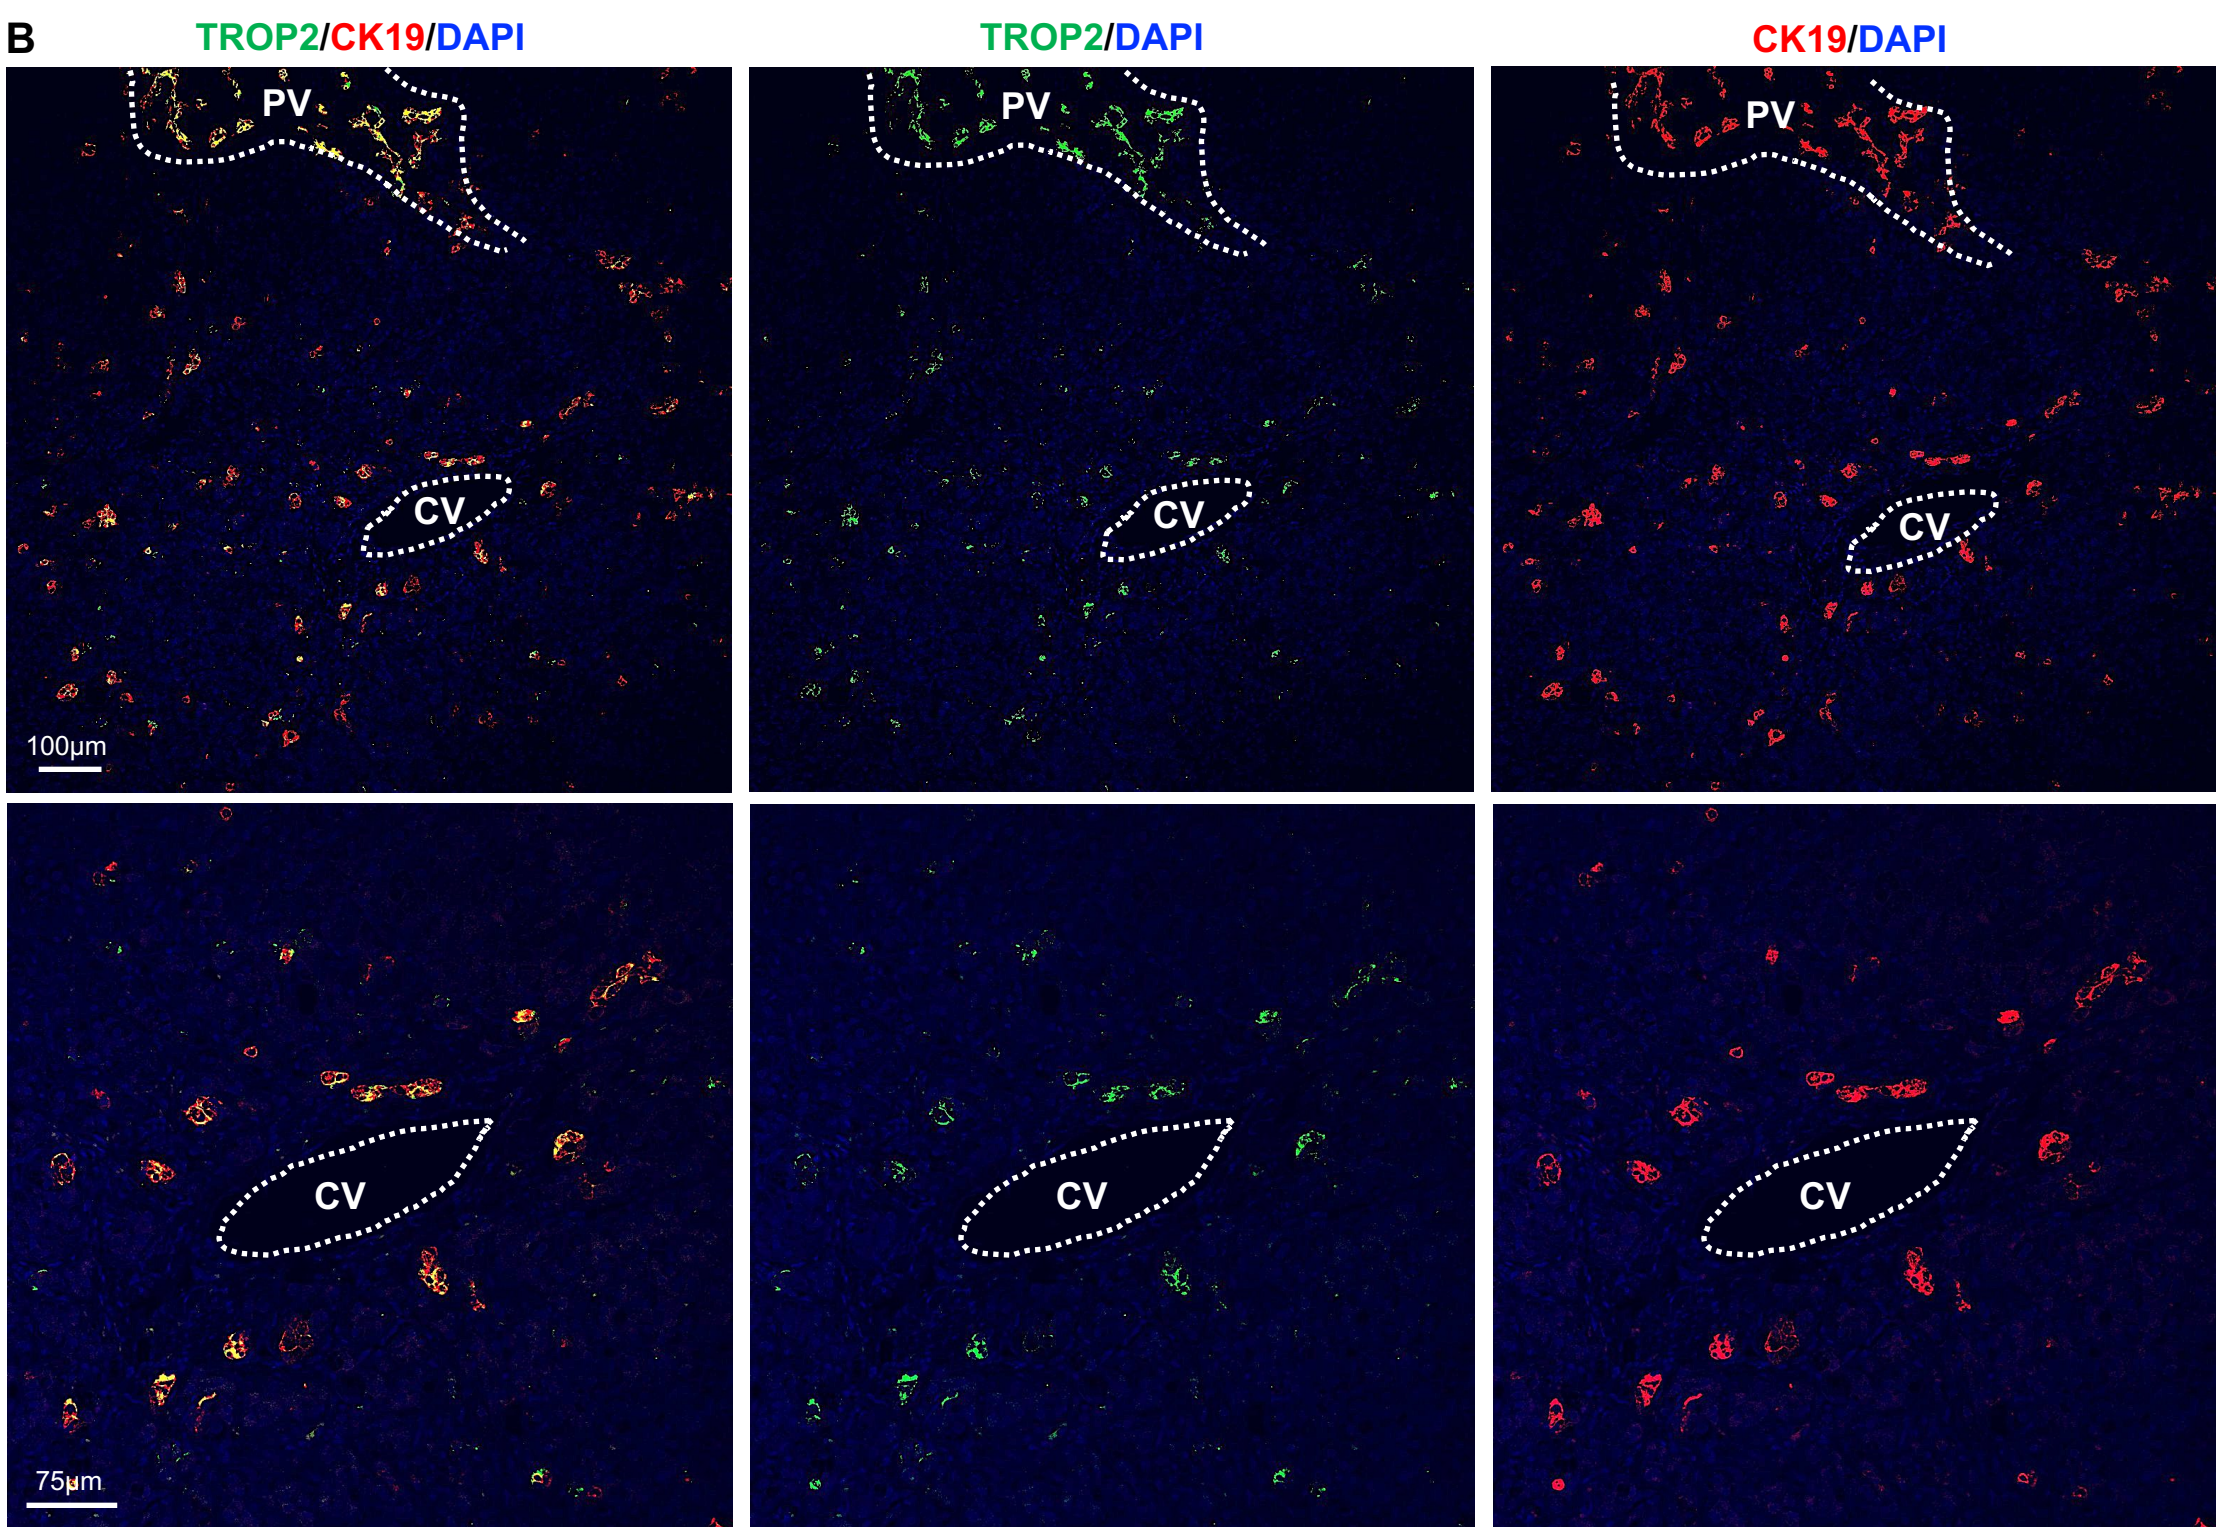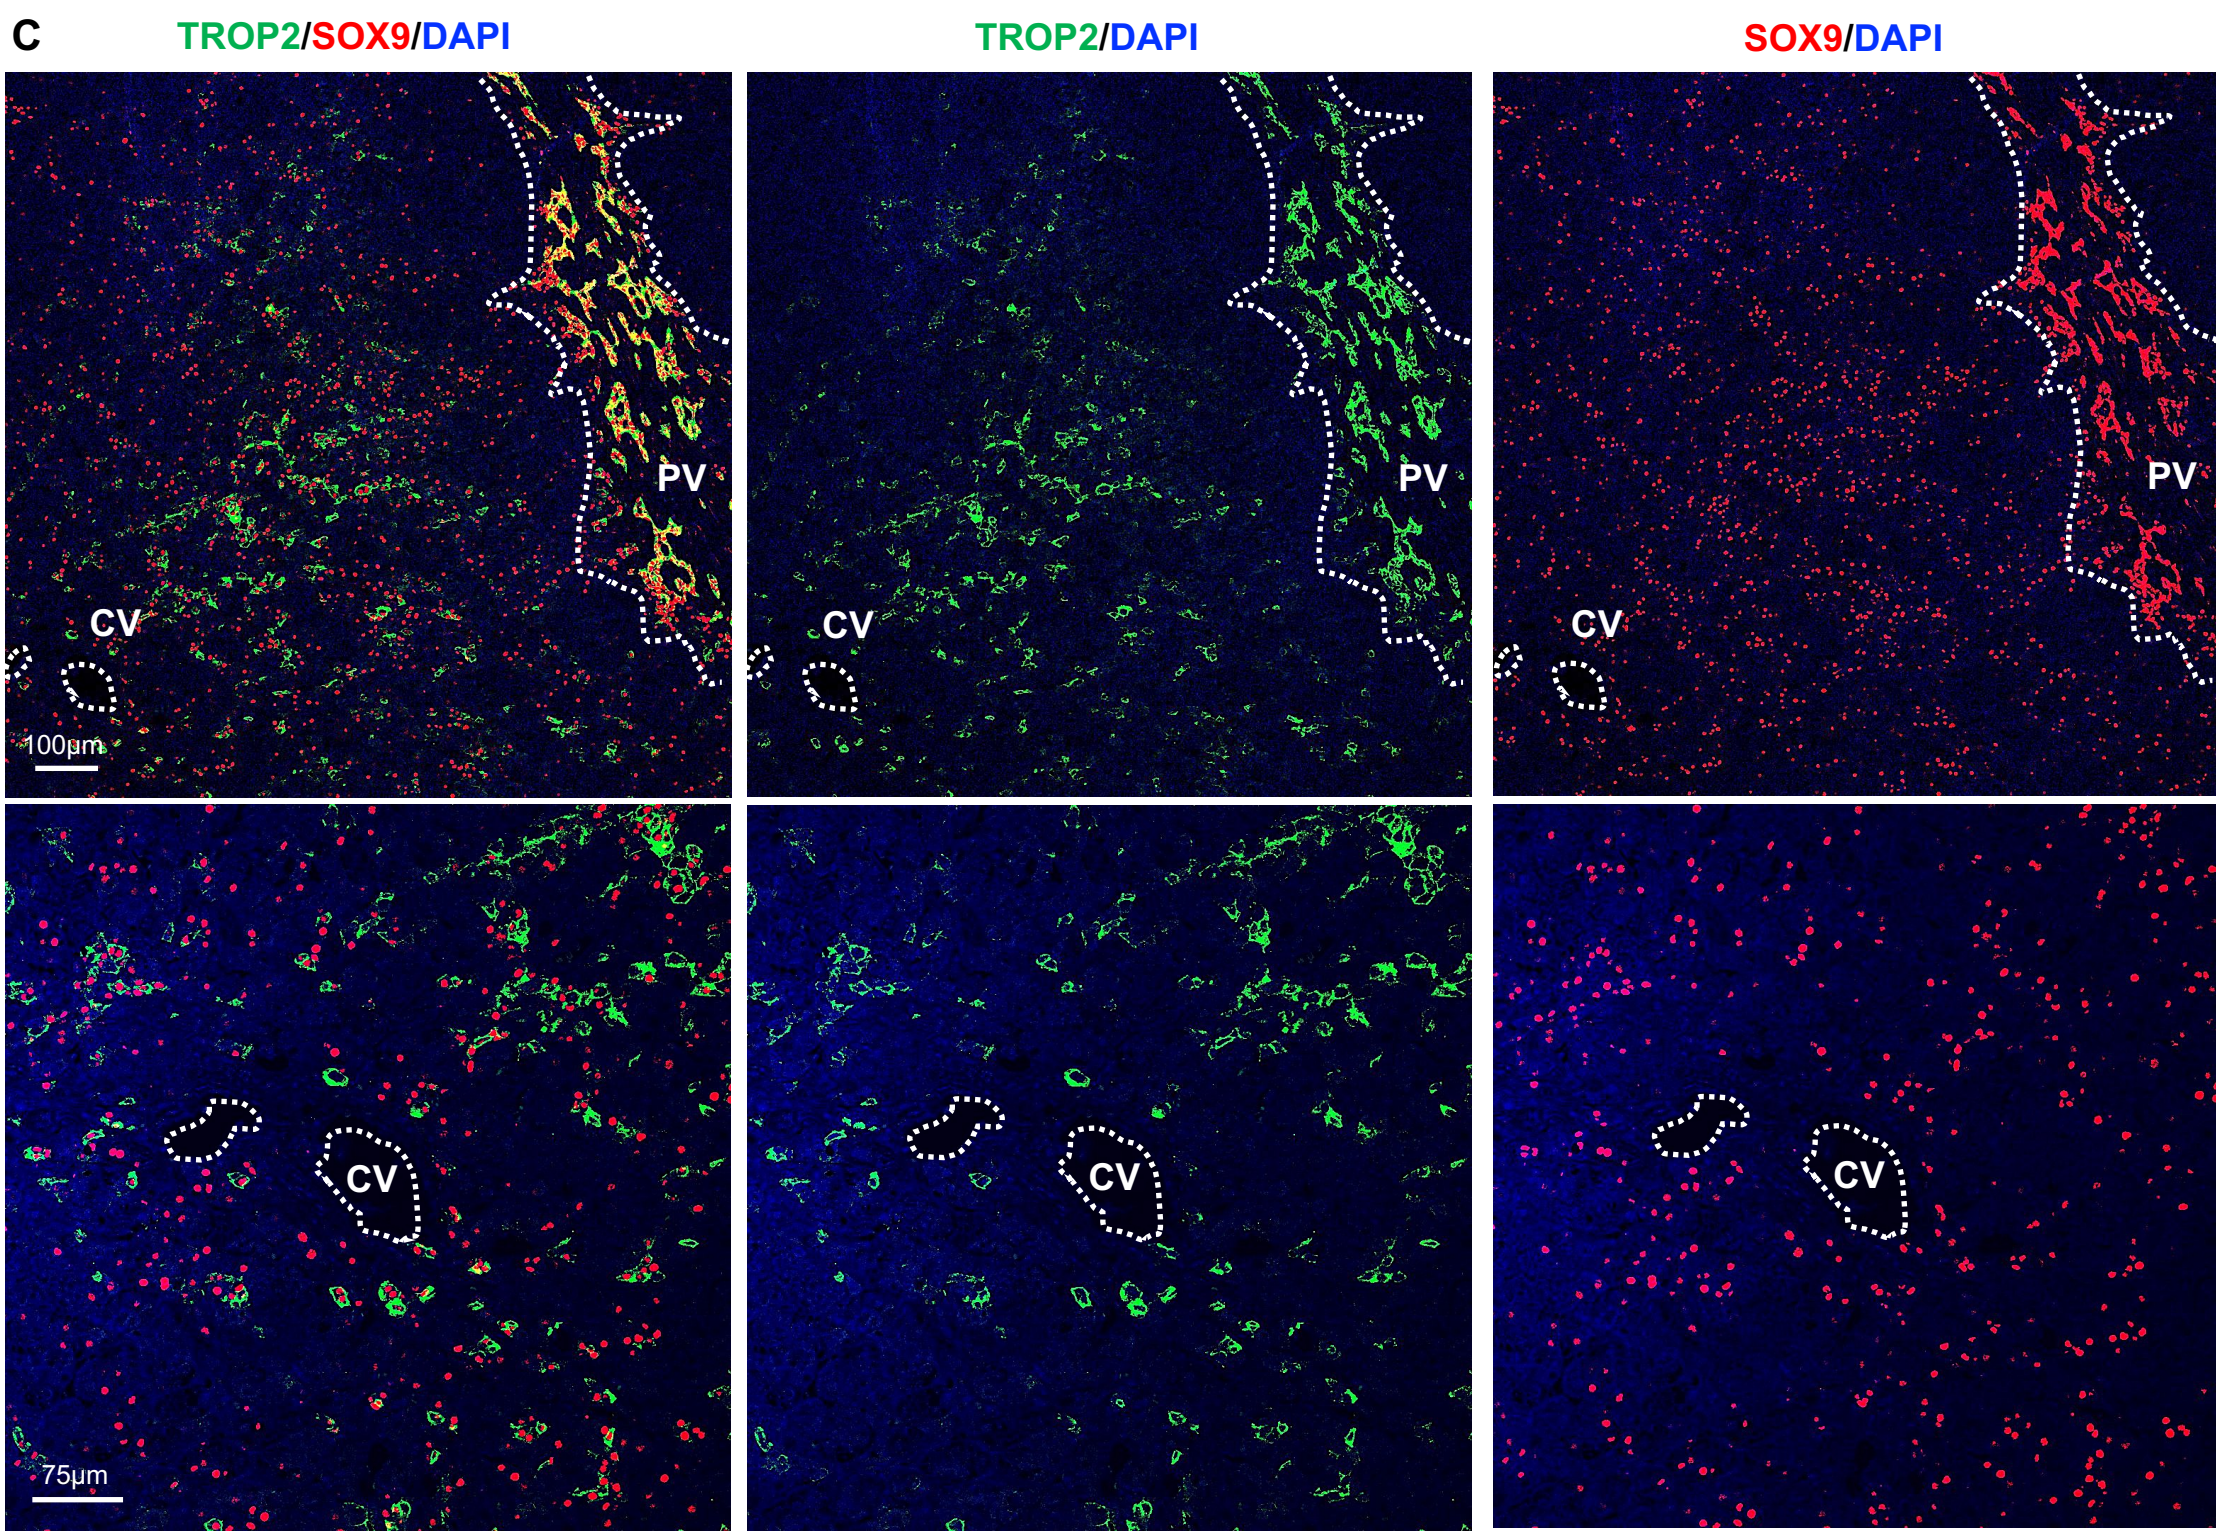

Supplement: 13287_2022_2795_MOESM1_ESM.pdf [file 13287_2022_2795_MOESM1_ESM.pdf]
